# Supplementary material
Source: Springer Nature journal article supplement (https://www.springermedizin.de/resource/supplementary/12947_2005_54_MOESM3_ESM.pdf/9556162)

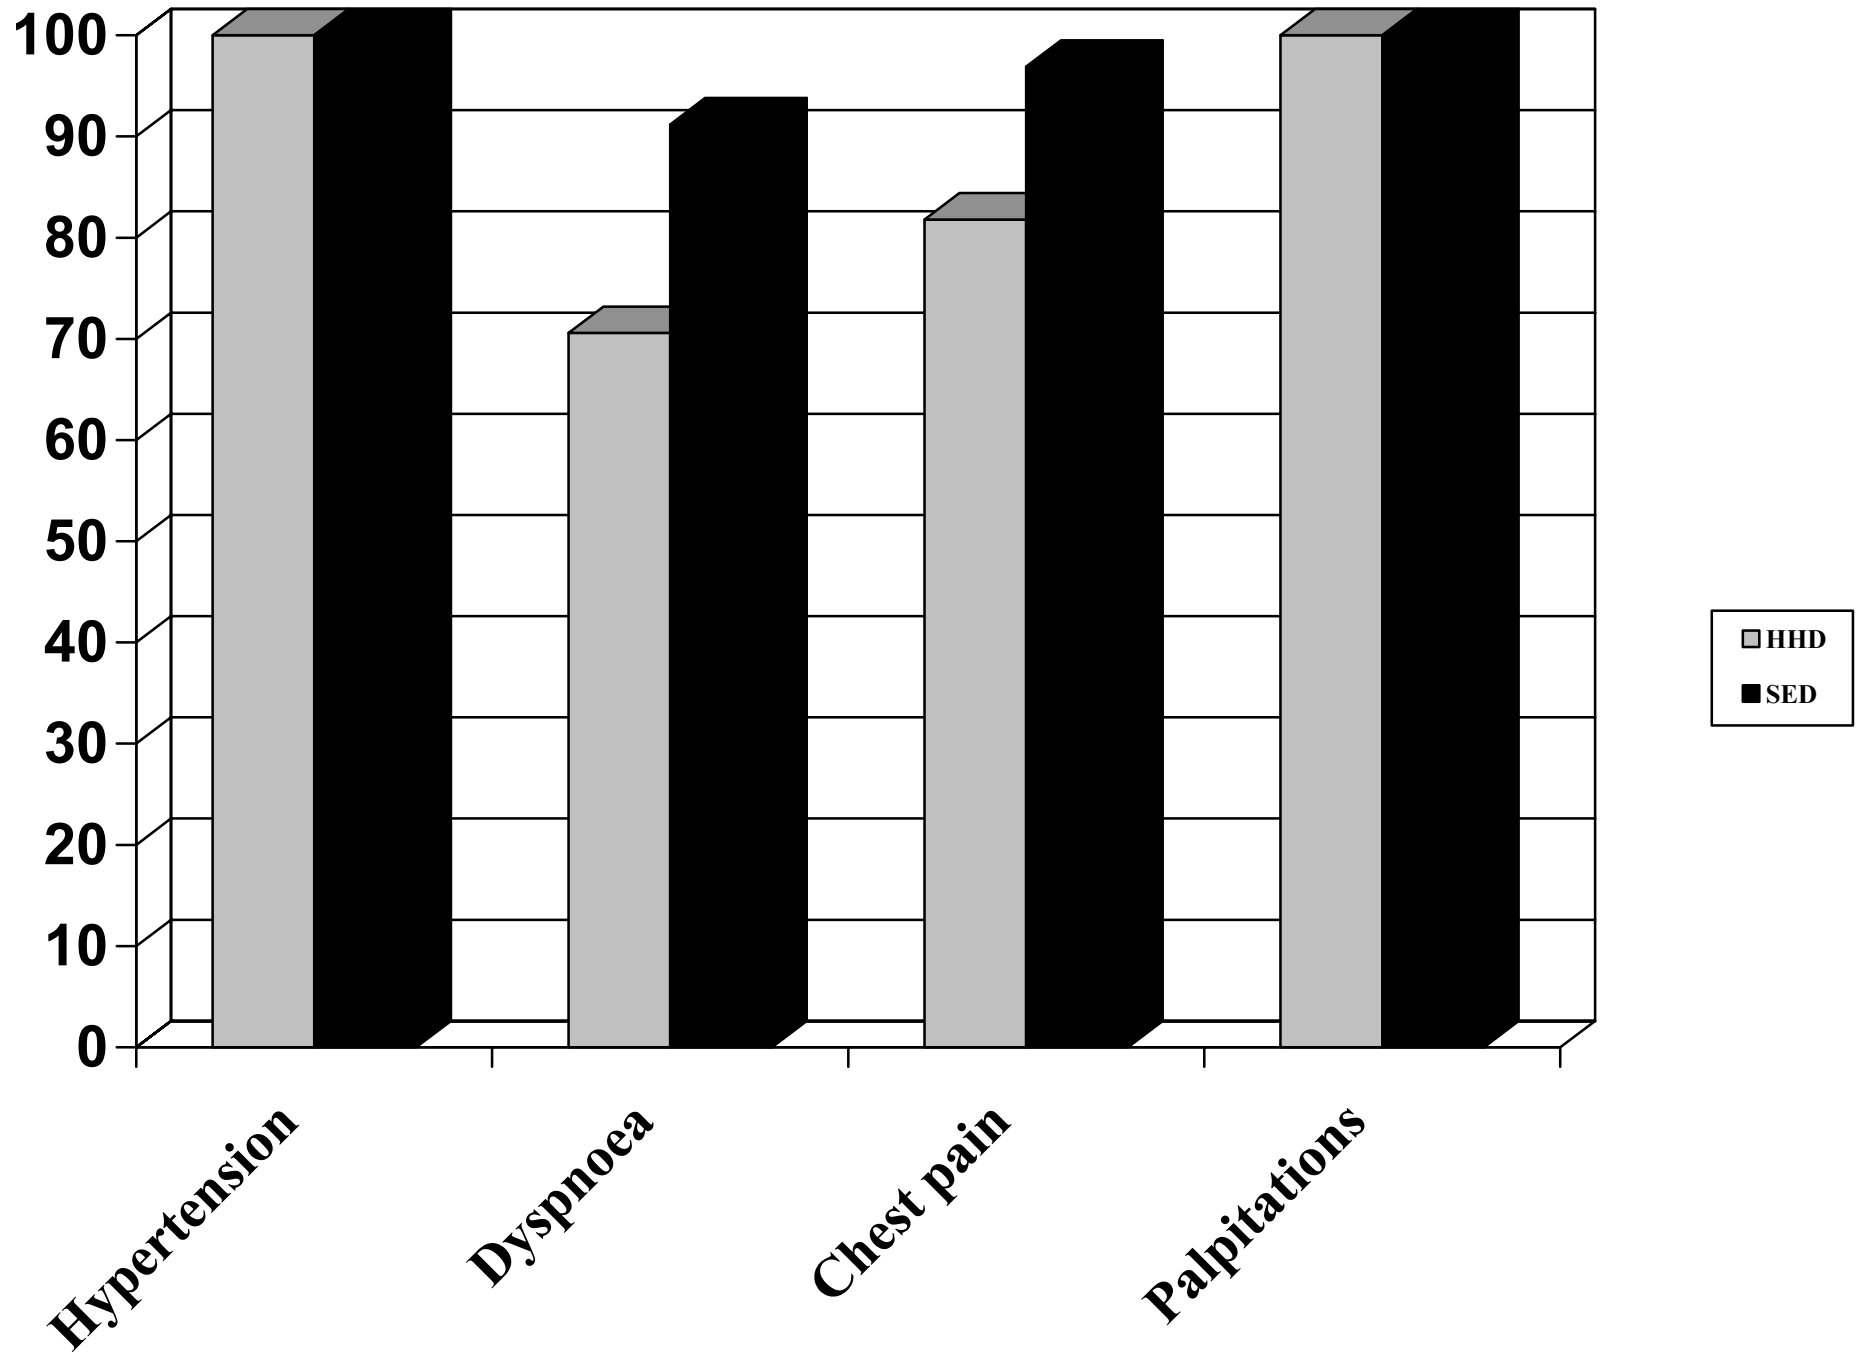

Supplement: MOESM3 [file 9556162]
